# Supplementary material
Source: HighWire-hosted journal article supplement (https://www.annfammed.org/highwire/filestream/8672/field_highwire_adjunct_files/0/Liaw_Supp_App.pdf)
Supplement: Liaw_Supp_App.pdf [file Liaw_Supp_App.pdf]

**Supplemental materials for:**

Liaw WR, Jetty A, Petterson S, Peterson LE, Bazemore AW. Solo and small practices: a vital, diverse part of primary care. *Ann Fam Med*. 2016;14:8-15.

## Appendix 1: Characteristics of Re-certifying and Non-recertifying American Board of Family Medicine Diplomates

| Physician Characteristic       | 2013 Re-certifiers<br>(n = 11,526)      | 2013 Non-Recertifiers<br>(n = 72,271) | P value |
|--------------------------------|-----------------------------------------|---------------------------------------|---------|
|                                | Mean (Standard Deviation) or Percentage |                                       |         |
| Age on July 1, 2013            | 50.7 (8.5)                              | 48.0 (10.4)                           | < 0.01  |
| Male sex                       | 63.3                                    | 59.3                                  | < 0.01  |
| Medical doctorate degree       | 91.4                                    | 90.8                                  | 0.04    |
| International medical graduate | 16.0                                    | 20.9                                  | < 0.01  |
| Number of times recertified    |                                         |                                       | < 0.01  |
| 0                              | 12.6                                    | 34.8                                  |         |
| 1                              | 30.3                                    | 22.6                                  |         |
| 2                              | 22.6                                    | 15.8                                  |         |
| 3                              | 17.4                                    | 14.0                                  |         |
| 4+                             | 17.2                                    | 12.8                                  |         |

## Appendix 2: American Board of Family Medicine Demographics Survey Questions 2013

| Question Number | Item                                                                                                                                                                                                                                                       | Item Type                                                                                                                                                                                                                                                                                                                                                                                                                                                                                                                                                                                  |
|-----------------|------------------------------------------------------------------------------------------------------------------------------------------------------------------------------------------------------------------------------------------------------------|--------------------------------------------------------------------------------------------------------------------------------------------------------------------------------------------------------------------------------------------------------------------------------------------------------------------------------------------------------------------------------------------------------------------------------------------------------------------------------------------------------------------------------------------------------------------------------------------|
| 1               | Number of years in practice                                                                                                                                                                                                                                | Free numeric response box                                                                                                                                                                                                                                                                                                                                                                                                                                                                                                                                                                  |
| 2               | "Percentage of your time by type of practice or professional activity (must total 100%)"                                                                                                                                                                   | <ul style="list-style-type: none"> <li>a. Direct patient care</li> <li>b. Research</li> <li>c. Administration</li> <li>d. Teaching</li> </ul>                                                                                                                                                                                                                                                                                                                                                                                                                                              |
| 3               | <p>Do you provide the following care in your practice? (Yes/no)</p> <p><b>Note: If no percentage is assigned to "Direct Patient Care" in question #2, skip this question</b></p>                                                                           | <ul style="list-style-type: none"> <li>a. Inpatient care</li> <li>b. Emergent Care</li> <li>c. Urgent Care</li> <li>d. Pain management</li> <li>e. Palliative Care</li> <li>f. Office surgery</li> <li>g. Major surgery</li> <li>h. Pre-operative Care</li> <li>i. Post-operative Care</li> <li>j. Sports medicine</li> <li>k. Occupational/Industrial Medicine</li> <li>l. Mental Health</li> <li>m. Musculo-Skeletal problems</li> <li>n. Women's health</li> <li>o. School Health</li> <li>p. Nursing Home Care</li> <li>q. Home Visits</li> <li>r. Other (free text option)</li> </ul> |
| 4               | <p>Do you see patients who are in the following age ranges? (Yes/No)</p> <p><b>Note: If no percentage is assigned to "Direct Patient Care" in question #2, skip this question</b></p>                                                                      | <ul style="list-style-type: none"> <li>a. Age &lt; 5</li> <li>b. Age 5-12</li> <li>c. Age 13-18</li> <li>d. Age 19-64</li> <li>e. Age 65-74</li> <li>f. Age 75 and older</li> </ul>                                                                                                                                                                                                                                                                                                                                                                                                        |
| 5               | <ul style="list-style-type: none"> <li>a. Primary practice address</li> <li>b. Practice #2 address</li> <li>c. Practice #3 address</li> </ul> <p><b>Note: If no percentage is assigned to "Direct Patient Care" in question #2, skip this question</b></p> |                                                                                                                                                                                                                                                                                                                                                                                                                                                                                                                                                                                            |
| 6               | <p>Percent clinical time in (MUST TOTAL 100%)</p> <p><b>Note: If no percentage is assigned to "Direct Patient Care" in question #2, skip this question</b></p>                                                                                             | <ul style="list-style-type: none"> <li>a. Primary practice</li> <li>b. Practice #2</li> <li>c. Practice #3</li> </ul>                                                                                                                                                                                                                                                                                                                                                                                                                                                                      |
| 7               | Race                                                                                                                                                                                                                                                       | <ul style="list-style-type: none"> <li>a. American Indian or Alaska Native</li> <li>b. Asian</li> <li>c. Black or African American</li> </ul>                                                                                                                                                                                                                                                                                                                                                                                                                                              |

|    |                                                                                                                                                                                               |                                                                                                                                                                                                                                                                                                                                                                                                                                                                                                                                                                                                                        |
|----|-----------------------------------------------------------------------------------------------------------------------------------------------------------------------------------------------|------------------------------------------------------------------------------------------------------------------------------------------------------------------------------------------------------------------------------------------------------------------------------------------------------------------------------------------------------------------------------------------------------------------------------------------------------------------------------------------------------------------------------------------------------------------------------------------------------------------------|
|    |                                                                                                                                                                                               | d. Native Hawaiian or Other Pacific Islander<br>e. White                                                                                                                                                                                                                                                                                                                                                                                                                                                                                                                                                               |
| 8  | Ethnicity                                                                                                                                                                                     | a. Non-Hispanic<br>b. Hispanic or Latino                                                                                                                                                                                                                                                                                                                                                                                                                                                                                                                                                                               |
| 9  | Do you use a language other than English to interact with patients?<br><br><b>Note: If no percentage is assigned to “Direct Patient Care” in question #2, skip this question</b>              | Yes, Spanish / Yes, Other (free text option) / No                                                                                                                                                                                                                                                                                                                                                                                                                                                                                                                                                                      |
| 10 | Are you a member of a medical school faculty                                                                                                                                                  | No; Yes, Part-time; Yes, Full-time                                                                                                                                                                                                                                                                                                                                                                                                                                                                                                                                                                                     |
| 11 | How many obstetrical deliveries do you do per year?<br><br><b>Note: If no percentage is assigned to “Direct Patient Care” in question #2, skip this question</b>                              | None; 1 to 25; 26 to 50; More than 50                                                                                                                                                                                                                                                                                                                                                                                                                                                                                                                                                                                  |
| 12 | Do you provide prenatal care?<br><br><b>Note: If no percentage is assigned to “Direct Patient Care” in question #2, skip this question</b>                                                    | Yes / No                                                                                                                                                                                                                                                                                                                                                                                                                                                                                                                                                                                                               |
| 13 | Do you take care of newborn infants?<br><br><b>Note: If no percentage is assigned to “Direct Patient Care” in question #2, skip this question</b>                                             | Yes, office; Yes, nursery; Yes, both; No                                                                                                                                                                                                                                                                                                                                                                                                                                                                                                                                                                               |
| 14 | Do you have admitting privileges in any hospital?<br><br><b>Note: If no percentage is assigned to “Direct Patient Care” in question #2, skip this question</b>                                | Yes / No                                                                                                                                                                                                                                                                                                                                                                                                                                                                                                                                                                                                               |
| 15 | Are you certified by another ABMS primary specialty board? Please indicate.                                                                                                                   | 23 Options auto-fill from past certification (from Data Commons in the future)                                                                                                                                                                                                                                                                                                                                                                                                                                                                                                                                         |
| 16 | Which of the following describe(s) your primary practice ownership? (Select one)<br><br><b>Note: If no percentage is assigned to “Direct Patient Care” in question #2, skip this question</b> | a. Private solo or group practice<br>b. Freestanding urgent care center<br>c. Hospital emergency department<br>d. Hospital outpatient department<br>e. Ambulatory surgical center<br>f. Industrial outpatient facility<br>g. Mental health center<br>h. Non-federal government clinic (e.g., state, county, city, maternal and child health, etc.)<br>i. Federally Qualified Health Center or Look-Alike<br>j. Rural Health Clinic<br>k. Indian Health Service Institutional setting (School-based Clinic, Nursing home, prison)<br>l. Academic Health Center / Faculty Practice<br>m. Health maintenance organization |

|    |                                                                                                                                                                                                               |                                                                                                                                                                                                                                                                                                                                                                                                                                    |
|----|---------------------------------------------------------------------------------------------------------------------------------------------------------------------------------------------------------------|------------------------------------------------------------------------------------------------------------------------------------------------------------------------------------------------------------------------------------------------------------------------------------------------------------------------------------------------------------------------------------------------------------------------------------|
|    |                                                                                                                                                                                                               | <p>(e.g., Kaiser Permanente)</p> <p>n. Federal (Military, Veterans Administration/Department of Defense)</p> <p>o. Public Health Service</p> <p>p. Other _____ (Free text)</p>                                                                                                                                                                                                                                                     |
| 17 | <p>Besides your office, where else do you routinely see patients? (Select all that apply)</p> <p><b>Note: If no percentage is assigned to “Direct Patient Care” in question #2, skip this question</b></p>    | <p>a. Emergency Department</p> <p>b. Hospital</p> <p>c. Intensive Care/Cardiac/other intensive care unit</p> <p>d. Patient’s Home</p> <p>e. Nursing home</p> <p>f. Hospice</p> <p>g. Public Health Department</p> <p>h. School</p> <p>i. Prison</p> <p>j. Work Site</p> <p>k. Not applicable</p>                                                                                                                                   |
| 18 | <p>Which of the following describes your primary practice site size? (Select all that apply)</p> <p><b>Note: If no percentage is assigned to “Direct Patient Care” in question #2, skip this question</b></p> | <p>a. Solo practice</p> <p>b. Small (2-5 Providers)</p> <p>c. Medium (6-20 Providers)</p> <p>d. Large (&gt;20 Providers)</p> <p>e. Other _____</p>                                                                                                                                                                                                                                                                                 |
| 19 | <p>Which of the following describes your primary practice site specialty mix?</p> <p><b>Note: If no percentage is assigned to “Direct Patient Care” in question #2, skip this question</b></p>                | <p>a. Single specialty</p> <p>b. Multi-specialty</p>                                                                                                                                                                                                                                                                                                                                                                               |
| 20 | <p>The following types of providers work in my primary practice (Select all that apply)</p> <p><b>Note: If no percentage is assigned to “Direct Patient Care” in question #2, skip this question</b></p>      | <p>a. Nurse Practitioner or Advanced Practice Nurse</p> <p>b. Registered Nurse</p> <p>c. Licensed Practice Nurse</p> <p>d. Physician Assistant</p> <p>e. Behavioral Specialist, non-MD (e.g. Licensed Social Worker, Psychologist, Psychiatric Nurse Practitioner)</p> <p>f. Social Worker</p> <p>g. Psychiatrist</p> <p>h. Physical or Occupational Therapist</p> <p>i. Midwife</p> <p>j. Pharmacist</p> <p>k. Not applicable</p> |
| 21 | <p>What was your level of educational debt (undergraduate &amp; graduate) at the end of medical school?</p>                                                                                                   | <p>a. None</p> <p>b. Less than \$25,000</p> <p>c. \$25,000-74,999</p> <p>d. \$75,000-149,999</p> <p>e. \$150,000-249,999</p> <p>f. &gt;\$250,000</p>                                                                                                                                                                                                                                                                               |
| 22 | <p>Did you participate in a loan repayment program?</p>                                                                                                                                                       | <p>Yes/No</p> <p>If yes, free text type</p>                                                                                                                                                                                                                                                                                                                                                                                        |
| 23 | <p>Approximately what is the size of your patient</p>                                                                                                                                                         | <p>Free text entry for number / I don’t know</p>                                                                                                                                                                                                                                                                                                                                                                                   |

|    |                                                                                                                                                                                                                                         |                                                                                                                       |
|----|-----------------------------------------------------------------------------------------------------------------------------------------------------------------------------------------------------------------------------------------|-----------------------------------------------------------------------------------------------------------------------|
|    | panel?<br><br><b>Note: If no percentage is assigned to “Direct Patient Care” in question #2, skip this question</b>                                                                                                                     | / Does not apply                                                                                                      |
| 24 | Patient Centered Medical Home (PCMH) Yes/No<br><br><b>Note: If no percentage is assigned to “Direct Patient Care” in question #2, skip this question</b>                                                                                | a. Is your practice a certified PCMH?<br>b. If not, are you considering applying? (only available if answers no to a) |
| 25 | Do you have someone in your office who functions as a Care Coordinator or provides patient population management services?<br><br><b>Note: If no percentage is assigned to “Direct Patient Care” in question #2, skip this question</b> | Yes/No                                                                                                                |
